# Supplementary material for: Metaproteome analysis reveals that syntrophy, competition, and phage-host interaction shape microbial communities in biogas plants
Source: PubMed Central journal article supplement (PMC6486700; doi:10.1186/s40168-019-0673-y), 2019-04-27
Supplement: 40168_2019_673_MOESM7_ESM.pdf [file 40168_2019_673_MOESM7_ESM.pdf]

| A. Bacterial families          |   | Total sum of spectra | Average BGP_02 | Average BGP_03 | Average BGP_04 | Average BGP_05a | Average BGP_05b | Average BGP_07 | Average BGP_09 | Average BGP_10 | Average BGP_X1 | Average BGP_X2 | Average BGP_X3 | Total amount of                          |
|--------------------------------|---|----------------------|----------------|----------------|----------------|-----------------|-----------------|----------------|----------------|----------------|----------------|----------------|----------------|------------------------------------------|
| <i>Bacillaceae</i>             | F | 37541                | 381 ± 67       | 954 ± 159      | 1178 ± 95      | 1501 ± 247      | 1159 ± 368      | 882 ± 95       | 760 ± 109      | 875 ± 151      | 536 ± 95       | 893 ± 63       | 268 ± 144      | %of all microorganisms 6.7%              |
|                                | P | 264                  | 3 ± 3          | 3 ± 2          | 4 ± 2          | 19 ± 8          | 17 ± 10         | 8 ± 4          | 5 ± 3          | 1 ± 1          | 4 ± 3          | 1 ± 2          | 2 ± 3          | %of phage proteins for this family 0.7%  |
|                                | C | 0                    | 0 ± 0          | 0 ± 0          | 0 ± 0          | 0 ± 0           | 0 ± 0           | 0 ± 0          | 0 ± 0          | 0 ± 0          | 0 ± 0          | 0 ± 0          | 0 ± 0          | %of CRISPR proteins for this family 0.0% |
| <i>Enterobacteriaceae</i>      | F | 19308                | 159 ± 12       | 543 ± 103      | 495 ± 125      | 587 ± 209       | 431 ± 139       | 594 ± 50       | 308 ± 45       | 350 ± 81       | 384 ± 105      | 373 ± 51       | 604 ± 751      | %of all microorganisms 3.4%              |
|                                | P | 538                  | 4 ± 1          | 2 ± 1          | 3 ± 1          | 17 ± 8          | 7 ± 5           | 4 ± 2          | 69 ± 17        | 4 ± 3          | 22 ± 4         | 2 ± 1          | 2 ± 2          | %of phage proteins for this family 2.8%  |
|                                | C | 71                   | 1 ± 1          | 0 ± 0          | 10 ± 3         | 1 ± 1           | 0 ± 1           | 0 ± 0          | 0 ± 0          | 0 ± 1          | 1 ± 1          | 2 ± 2          | 0 ± 0          | %of CRISPR proteins for this family 0.4% |
| <i>Thermoanaerobacteraceae</i> | F | 11565                | 692 ± 482      | 24 ± 9         | 108 ± 45       | 540 ± 155       | 373 ± 135       | 68 ± 12        | 348 ± 84       | 456 ± 180      | 47 ± 29        | 229 ± 36       | 8 ± 7          | %of all microorganisms 2.1%              |
|                                | P | 0                    | 0 ± 0          | 0 ± 0          | 0 ± 0          | 0 ± 0           | 0 ± 0           | 0 ± 0          | 0 ± 0          | 0 ± 0          | 0 ± 0          | 0 ± 0          | 0 ± 0          | %of phage proteins for this family 0.0%  |
|                                | C | 0                    | 0 ± 0          | 0 ± 0          | 0 ± 0          | 0 ± 0           | 0 ± 0           | 0 ± 0          | 0 ± 0          | 0 ± 0          | 0 ± 0          | 0 ± 0          | 0 ± 0          | %of CRISPR proteins for this family 0.0% |
| <i>Desulfovibrionaceae</i>     | F | 9585                 | 102 ± 32       | 474 ± 167      | 180 ± 54       | 94 ± 25         | 91 ± 34         | 481 ± 153      | 82 ± 17        | 304 ± 95       | 226 ± 95       | 138 ± 84       | 226 ± 230      | %of all microorganisms 1.7%              |
|                                | P | 0                    | 0 ± 0          | 0 ± 0          | 0 ± 0          | 0 ± 0           | 0 ± 0           | 0 ± 0          | 0 ± 0          | 0 ± 0          | 0 ± 0          | 0 ± 0          | 0 ± 0          | %of phage proteins for this family 0.0%  |
|                                | C | 1                    | 0 ± 0          | 0 ± 0          | 0 ± 0          | 0 ± 0           | 0 ± 0           | 0 ± 0          | 0 ± 0          | 0 ± 1          | 0 ± 0          | 0 ± 0          | 0 ± 0          | %of CRISPR proteins for this family 0.0% |
| <i>Thermotogaceae</i>          | F | 8618                 | 16 ± 4         | 24 ± 6         | 42 ± 10        | 1043 ± 153      | 917 ± 233       | 16 ± 5         | 18 ± 5         | 10 ± 4         | 22 ± 4         | 28 ± 17        | 19 ± 11        | %of all microorganisms 1.5%              |
|                                | P | 0                    | 0 ± 0          | 0 ± 0          | 0 ± 0          | 0 ± 0           | 0 ± 0           | 0 ± 0          | 0 ± 0          | 0 ± 0          | 0 ± 0          | 0 ± 0          | 0 ± 0          | %of phage proteins for this family 0.0%  |
|                                | C | 0                    | 0 ± 0          | 0 ± 0          | 0 ± 0          | 0 ± 0           | 0 ± 0           | 0 ± 0          | 0 ± 0          | 0 ± 0          | 0 ± 0          | 0 ± 0          | 0 ± 0          | %of CRISPR proteins for this family 0.0% |
| <i>Spirochaetaceae</i>         | F | 7847                 | 53 ± 23        | 82 ± 8         | 156 ± 17       | 104 ± 28        | 101 ± 11        | 347 ± 86       | 47 ± 5         | 765 ± 318      | 141 ± 22       | 131 ± 14       | 35 ± 42        | %of all microorganisms 1.4%              |
|                                | P | 0                    | 0 ± 0          | 0 ± 0          | 0 ± 0          | 0 ± 0           | 0 ± 0           | 0 ± 0          | 0 ± 0          | 0 ± 0          | 0 ± 0          | 0 ± 0          | 0 ± 0          | %of phage proteins for this family 0.0%  |
|                                | C | 0                    | 0 ± 0          | 0 ± 0          | 0 ± 0          | 0 ± 0           | 0 ± 0           | 0 ± 0          | 0 ± 0          | 0 ± 0          | 0 ± 0          | 0 ± 0          | 0 ± 0          | %of CRISPR proteins for this family 0.0% |
| <i>Rhizobiaceae</i>            | F | 7406                 | 43 ± 30        | 192 ± 41       | 325 ± 25       | 224 ± 78        | 209 ± 21        | 109 ± 25       | 127 ± 29       | 191 ± 38       | 205 ± 74       | 164 ± 33       | 62 ± 64        | %of all microorganisms 1.3%              |
|                                | P | 0                    | 0 ± 0          | 0 ± 0          | 0 ± 0          | 0 ± 0           | 0 ± 0           | 0 ± 0          | 0 ± 0          | 0 ± 0          | 0 ± 0          | 0 ± 0          | 0 ± 0          | %of phage proteins for this family 0.0%  |
|                                | C | 0                    | 0 ± 0          | 0 ± 0          | 0 ± 0          | 0 ± 0           | 0 ± 0           | 0 ± 0          | 0 ± 0          | 0 ± 0          | 0 ± 0          | 0 ± 0          | 0 ± 0          | %of CRISPR proteins for this family 0.0% |
| <i>Clostridiaceae</i>          | F | 7279                 | 75 ± 24        | 288 ± 21       | 212 ± 42       | 432 ± 65        | 333 ± 96        | 145 ± 32       | 46 ± 9         | 73 ± 2         | 72 ± 40        | 111 ± 14       | 33 ± 22        | %of all microorganisms 1.3%              |
|                                | P | 166                  | 0 ± 0          | 0 ± 0          | 0 ± 0          | 31 ± 19         | 11 ± 4          | 0 ± 0          | 0 ± 0          | 0 ± 0          | 0 ± 0          | 0 ± 0          | 0 ± 0          | %of phage proteins for this family 2.3%  |
|                                | C | 0                    | 0 ± 0          | 0 ± 0          | 0 ± 0          | 0 ± 0           | 0 ± 0           | 0 ± 0          | 0 ± 0          | 0 ± 0          | 0 ± 0          | 0 ± 0          | 0 ± 0          | %of CRISPR proteins for this family 0.0% |
| <i>Streptococcaceae</i>        | F | 3675                 | 219 ± 163      | 130 ± 27       | 45 ± 13        | 88 ± 31         | 57 ± 15         | 68 ± 20        | 40 ± 22        | 64 ± 30        | 33 ± 16        | 159 ± 133      | 18 ± 12        | %of all microorganisms 0.7%              |
|                                | P | 10                   | 0 ± 0          | 0 ± 1          | 1 ± 1          | 0 ± 0           | 0 ± 1           | 1 ± 1          | 1 ± 1          | 0 ± 0          | 0 ± 0          | 0 ± 0          | 0 ± 1          | %of phage proteins for this family 0.3%  |
|                                | C | 3                    | 0 ± 0          | 0 ± 0          | 0 ± 0          | 1 ± 1           | 0 ± 0           | 0 ± 0          | 0 ± 0          | 0 ± 0          | 0 ± 0          | 0 ± 0          | 0 ± 0          | %of CRISPR proteins for this family 0.1% |
| <i>Mycobacteriaceae</i>        | F | 2561                 | 46 ± 12        | 143 ± 42       | 81 ± 13        | 97 ± 18         | 91 ± 45         | 48 ± 8         | 31 ± 9         | 19 ± 4         | 30 ± 10        | 33 ± 16        | 24 ± 15        | %of all microorganisms 0.5%              |
|                                | P | 27                   | 0 ± 1          | 0 ± 0          | 0 ± 0          | 1 ± 1           | 1 ± 1           | 1 ± 1          | 1 ± 1          | 0 ± 0          | 1 ± 1          | 3 ± 3          | 0 ± 1          | %of phage proteins for this family 1.1%  |
|                                | C | 59                   | 0 ± 0          | 6 ± 4          | 2 ± 1          | 0 ± 0           | 0 ± 0           | 5 ± 3          | 0 ± 0          | 0 ± 1          | 0 ± 0          | 1 ± 2          | 1 ± 1          | %of CRISPR proteins for this family 2.3% |
| <i>Enterococcaceae</i>         | F | 2512                 | 2 ± 2          | 13 ± 4         | 215 ± 54       | 48 ± 25         | 40 ± 13         | 53 ± 17        | 108 ± 21       | 16 ± 10        | 66 ± 12        | 58 ± 24        | 10 ± 9         | %of all microorganisms 0.4%              |
|                                | P | 3                    | 0 ± 0          | 0 ± 0          | 0 ± 0          | 0 ± 0           | 0 ± 0           | 0 ± 0          | 0 ± 0          | 0 ± 0          | 0 ± 0          | 0 ± 0          | 1 ± 1          | %of phage proteins for this family 0.1%  |
|                                | C | 0                    | 0 ± 0          | 0 ± 0          | 0 ± 0          | 0 ± 0           | 0 ± 0           | 0 ± 0          | 0 ± 0          | 0 ± 0          | 0 ± 0          | 0 ± 0          | 0 ± 0          | %of CRISPR proteins for this family 0.0% |
| <i>Pseudomonadaceae</i>        | F | 1875                 | 14 ± 3         | 49 ± 12        | 57 ± 9         | 35 ± 3          | 37 ± 6          | 86 ± 5         | 42 ± 36        | 59 ± 20        | 51 ± 21        | 31 ± 9         | 9 ± 5          | %of all microorganisms 0.3%              |
|                                | P | 283                  | 1 ± 1          | 1 ± 1          | 1 ± 1          | 39 ± 15         | 28 ± 16         | 2 ± 2          | 0 ± 0          | 0 ± 0          | 0 ± 1          | 0 ± 1          | 0 ± 0          | %of phage proteins for this family 15.1% |
|                                | C | 0                    | 0 ± 0          | 0 ± 0          | 0 ± 0          | 0 ± 0           | 0 ± 0           | 0 ± 0          | 0 ± 0          | 0 ± 0          | 0 ± 0          | 0 ± 0          | 0 ± 0          | %of CRISPR proteins for this family 0.0% |
| <i>Vibrionaceae</i>            | F | 1649                 | 6 ± 2          | 40 ± 18        | 33 ± 6         | 123 ± 24        | 92 ± 32         | 27 ± 4         | 5 ± 2          | 9 ± 1          | 14 ± 7         | 25 ± 14        | 40 ± 38        | %of all microorganisms 0.3%              |
|                                | P | 36                   | 0 ± 0          | 3 ± 2          | 1 ± 1          | 0 ± 0           | 0 ± 0           | 0 ± 0          | 0 ± 0          | 0 ± 0          | 0 ± 0          | 2 ± 2          | 4 ± 2          | %of phage proteins for this family 2.2%  |
|                                | C | 0                    | 0 ± 0          | 0 ± 0          | 0 ± 0          | 0 ± 0           | 0 ± 0           | 0 ± 0          | 0 ± 0          | 0 ± 0          | 0 ± 0          | 0 ± 0          | 0 ± 0          | %of CRISPR proteins for this family 0.0% |
| <i>Pasteurellaceae</i>         | F | 1347                 | 21 ± 5         | 51 ± 15        | 39 ± 9         | 27 ± 14         | 38 ± 15         | 65 ± 24        | 8 ± 2          | 28 ± 10        | 14 ± 8         | 23 ± 8         | 24 ± 24        | %of all microorganisms 0.2%              |
|                                | P | 8                    | 1 ± 1          | 1 ± 1          | 0 ± 0          | 0 ± 0           | 0 ± 0           | 0 ± 0          | 0 ± 0          | 0 ± 0          | 0 ± 0          | 0 ± 0          | 0 ± 1          | %of phage proteins for this family 0.6%  |
|                                | C | 27                   | 0 ± 0          | 5 ± 4          | 2 ± 2          | 0 ± 0           | 0 ± 0           | 0 ± 0          | 0 ± 0          | 0 ± 0          | 0 ± 0          | 0 ± 0          | 0 ± 1          | %of CRISPR proteins for this family 2.0% |
| <i>Streptomyetaceae</i>        | F | 1000                 | 10 ± 7         | 54 ± 1         | 30 ± 8         | 26 ± 11         | 35 ± 10         | 26 ± 8         | 9 ± 1          | 20 ± 10        | 21 ± 3         | 15 ± 5         | 5 ± 3          | %of all microorganisms 0.2%              |
|                                | P | 10                   | 0 ± 0          | 0 ± 0          | 0 ± 0          | 2 ± 2           | 1 ± 1           | 0 ± 0          | 0 ± 0          | 0 ± 0          | 0 ± 0          | 0 ± 1          | 0 ± 0          | %of phage proteins for this family 1.0%  |
|                                | C | 0                    | 0 ± 0          | 0 ± 0          | 0 ± 0          | 0 ± 0           | 0 ± 0           | 0 ± 0          | 0 ± 0          | 0 ± 0          | 0 ± 0          | 0 ± 0          | 0 ± 0          | %of CRISPR proteins for this family 0.0% |
| <i>Acholeplasmataceae</i>      | F | 894                  | 18 ± 2         | 27 ± 9         | 21 ± 1         | 35 ± 20         | 21 ± 6          | 18 ± 3         | 24 ± 3         | 9 ± 2          | 19 ± 3         | 20 ± 14        | 11 ± 6         | %of all microorganisms 0.2%              |
|                                | P | 89                   | 0 ± 0          | 0 ± 0          | 0 ± 0          | 7 ± 2           | 7 ± 3           | 5 ± 3          | 4 ± 2          | 0 ± 0          | 0 ± 0          | 0 ± 0          | 0 ± 0          | %of phage proteins for this family 10.0% |
|                                | C | 0                    | 0 ± 0          | 0 ± 0          | 0 ± 0          | 0 ± 0           | 0 ± 0           | 0 ± 0          | 0 ± 0          | 0 ± 0          | 0 ± 0          | 0 ± 0          | 0 ± 0          | %of CRISPR proteins for this family 0.0% |
| <i>Chlamydiaceae</i>           | F | 529                  | 3 ± 2          | 20 ± 8         | 7 ± 1          | 39 ± 6          | 28 ± 3          | 6 ± 5          | 5 ± 2          | 1 ± 1          | 8 ± 6          | 11 ± 12        | 4 ± 2          | %of all microorganisms 0.1%              |
|                                | P | 47                   | 0 ± 0          | 0 ± 0          | 0 ± 0          | 0 ± 0           | 0 ± 0           | 0 ± 1          | 0 ± 0          | 10 ± 4         | 2 ± 1          | 0 ± 0          | 0 ± 0          | %of phage proteins for this family 8.9%  |
|                                | C | 0                    | 0 ± 0          | 0 ± 0          | 0 ± 0          | 0 ± 0           | 0 ± 0           | 0 ± 0          | 0 ± 0          | 0 ± 0          | 0 ± 0          | 0 ± 0          | 0 ± 0          | %of CRISPR proteins for this family 0.0% |
| <i>Burkholderiaceae</i>        | F | 436                  | 1 ± 1          | 36 ± 9         | 18 ± 9         | 21 ± 9          | 12 ± 4          | 5 ± 3          | 1 ± 1          | 2 ± 1          | 4 ± 1          | 6 ± 5          | 4 ± 2          | %of all microorganisms 0.1%              |
|                                | P | 9                    | 1 ± 3          | 0 ± 0          | 0 ± 0          | 1 ± 1           | 0 ± 1           | 0 ± 0          | 0 ± 0          | 0 ± 0          | 0 ± 0          | 0 ± 1          | 0 ± 0          | %of phage proteins for this family 2.1%  |
|                                | C | 0                    | 0 ± 0          | 0 ± 0          | 0 ± 0          | 0 ± 0           | 0 ± 0           | 0 ± 0          | 0 ± 0          | 0 ± 0          | 0 ± 0          | 0 ± 0          | 0 ± 0          | %of CRISPR proteins for this family 0.0% |
| <i>Neisseriaceae</i>           | F | 323                  | 5 ± 6          | 21 ± 3         | 3 ± 2          | 5 ± 3           | 5 ± 5           | 9 ± 3          | 1 ± 1          | 1 ± 1          | 1 ± 1          | 18 ± 19        | 13 ± 12        | %of all microorganisms 0.1%              |
|                                | P | 0                    | 0 ± 0          | 0 ± 0          | 0 ± 0          | 0 ± 0           | 0 ± 0           | 0 ± 0          | 0 ± 0          | 0 ± 0          | 0 ± 0          | 0 ± 0          | 0 ± 0          | %of phage proteins for this family 0.0%  |
|                                | C | 3                    | 0 ± 0          | 1 ± 1          | 0 ± 0          | 0 ± 1           | 0 ± 0           | 0 ± 0          | 0 ± 0          | 0 ± 0          | 0 ± 0          | 0 ± 0          | 0 ± 0          | %of CRISPR proteins for this family 0.9% |
| <i>Chlorobiaceae</i>           | F | 298                  | 2 ± 2          | 16 ± 9         | 15 ± 2         | 9 ± 3           | 8 ± 2           | 6 ± 4          | 4 ± 1          | 3 ± 2          | 5 ± 1          | 6 ± 1          | 1 ± 1          | %of all microorganisms 0.1%              |
|                                | P | 0                    | 0 ± 0          | 0 ± 0          | 0 ± 0          | 0 ± 0           | 0 ± 0           | 0 ± 0          | 0 ± 0          | 0 ± 0          | 0 ± 0          | 0 ± 0          | 0 ± 0          | %of phage proteins for this family 0.0%  |
|                                | C | 8                    | 0 ± 0          | 2 ± 2          | 0 ± 1          | 0 ± 0           | 0 ± 0           | 0 ± 0          | 0 ± 0          | 0 ± 0          | 0 ± 0          | 0 ± 0          | 0 ± 0          | %of CRISPR proteins for this family 2.7% |

|                                   |   |        |            |            |            |             |             |            |            |            |            |            |             |                                     |         |
|-----------------------------------|---|--------|------------|------------|------------|-------------|-------------|------------|------------|------------|------------|------------|-------------|-------------------------------------|---------|
| Thermaceae                        | F | 237    | 1 ± 1      | 3 ± 3      | 7 ± 1      | 19 ± 7      | 15 ± 9      | 2 ± 2      | 3 ± 2      | 2 ± 2      | 4 ± 1      | 3 ± 2      | 2 ± 3       | %of all microorganisms              | 0.0%    |
|                                   | P | 0      | 0 ± 0      | 0 ± 0      | 0 ± 0      | 0 ± 0       | 0 ± 0       | 0 ± 0      | 0 ± 0      | 0 ± 0      | 0 ± 0      | 0 ± 0      | 0 ± 0       | %of phage proteins for this family  | 0.0%    |
|                                   | C | 4      | 0 ± 1      | 0 ± 0      | 1 ± 1      | 0 ± 0       | 0 ± 0       | 0 ± 0      | 0 ± 0      | 0 ± 0      | 0 ± 0      | 0 ± 0      | 0 ± 0       | %of CRISPR proteins for this family | 1.7%    |
| Listeriaceae                      | F | 217    | 1 ± 1      | 11 ± 7     | 5 ± 2      | 5 ± 4       | 1 ± 1       | 5 ± 3      | 11 ± 5     | 8 ± 4      | 3 ± 1      | 7 ± 5      | 1 ± 2       | %of all microorganisms              | 0.0%    |
|                                   | P | 2      | 0 ± 1      | 0 ± 0      | 0 ± 0      | 0 ± 0       | 0 ± 0       | 0 ± 0      | 0 ± 1      | 0 ± 0      | 0 ± 0      | 0 ± 0      | 0 ± 0       | %of phage proteins for this family  | 0.9%    |
|                                   | C | 0      | 0 ± 0      | 0 ± 0      | 0 ± 0      | 0 ± 0       | 0 ± 0       | 0 ± 0      | 0 ± 0      | 0 ± 0      | 0 ± 0      | 0 ± 0      | 0 ± 0       | %of CRISPR proteins for this family | 0.0%    |
| Geobacteraceae                    | F | 141    | 9 ± 11     | 6 ± 5      | 1 ± 1      | 5 ± 6       | 3 ± 1       | 1 ± 1      | 5 ± 4      | 1 ± 1      | 1 ± 1      | 3 ± 3      | 2 ± 2       | %of all microorganisms              | 0.0%    |
|                                   | P | 0      | 0 ± 0      | 0 ± 0      | 0 ± 0      | 0 ± 0       | 0 ± 0       | 0 ± 0      | 0 ± 0      | 0 ± 0      | 0 ± 0      | 0 ± 0      | 0 ± 0       | %of phage proteins for this family  | 0.0%    |
|                                   | C | 1      | 0 ± 0      | 0 ± 0      | 0 ± 0      | 0 ± 1       | 0 ± 0       | 0 ± 0      | 0 ± 0      | 0 ± 0      | 0 ± 0      | 0 ± 0      | 0 ± 0       | %of CRISPR proteins for this family | 0.7%    |
| Rhodospirillaceae                 | F | 72     | 1 ± 1      | 7 ± 5      | 2 ± 3      | 2 ± 3       | 1 ± 1       | 2 ± 3      | 1 ± 1      | 0 ± 0      | 1 ± 1      | 1 ± 1      | 1 ± 1       | %of all microorganisms              | 0.0%    |
|                                   | P | 0      | 0 ± 0      | 0 ± 0      | 0 ± 0      | 0 ± 0       | 0 ± 0       | 0 ± 0      | 0 ± 0      | 0 ± 0      | 0 ± 0      | 0 ± 0      | 0 ± 0       | %of phage proteins for this family  | 0.0%    |
|                                   | C | 7      | 0 ± 0      | 0 ± 0      | 0 ± 1      | 0 ± 0       | 0 ± 0       | 2 ± 2      | 0 ± 0      | 0 ± 0      | 0 ± 0      | 0 ± 0      | 0 ± 0       | %of CRISPR proteins for this family | 9.7%    |
| Bdellovibrionaceae                | F | 12     | 0 ± 0      | 0 ± 1      | 0 ± 0      | 0 ± 1       | 1 ± 1       | 0 ± 0      | 0 ± 1      | 0 ± 1      | 1 ± 1      | 0 ± 1      | 0 ± 0       | %of all microorganisms              | 0.0%    |
|                                   | P | 3      | 1 ± 1      | 0 ± 0      | 0 ± 0      | 0 ± 0       | 0 ± 0       | 0 ± 0      | 0 ± 0      | 0 ± 0      | 0 ± 0      | 0 ± 0      | 0 ± 0       | %of phage proteins for this family  | 25.0%   |
|                                   | C | 0      | 0 ± 0      | 0 ± 0      | 0 ± 0      | 0 ± 0       | 0 ± 0       | 0 ± 0      | 0 ± 0      | 0 ± 0      | 0 ± 0      | 0 ± 0      | 0 ± 0       | %of CRISPR proteins for this family | 0.0%    |
| Halomonadaceae                    | F | 7      | 0 ± 1      | 0 ± 0      | 0 ± 0      | 1 ± 1       | 0 ± 1       | 1 ± 1      | 0 ± 0      | 0 ± 0      | 0 ± 0      | 0 ± 0      | 0 ± 0       | %of all microorganisms              | 0.0%    |
|                                   | P | 74     | 0 ± 1      | 0 ± 0      | 0 ± 0      | 9 ± 7       | 9 ± 8       | 0 ± 0      | 0 ± 0      | 0 ± 1      | 0 ± 0      | 0 ± 1      | 0 ± 0       | %of phage proteins for this family  | 1057.1% |
|                                   | C | 0      | 0 ± 0      | 0 ± 0      | 0 ± 0      | 0 ± 0       | 0 ± 0       | 0 ± 0      | 0 ± 0      | 0 ± 0      | 0 ± 0      | 0 ± 0      | 0 ± 0       | %of CRISPR proteins for this family | 0.0%    |
| Spiroplasmataceae                 | F | 0      | 0 ± 0      | 0 ± 0      | 0 ± 0      | 0 ± 0       | 0 ± 0       | 0 ± 0      | 0 ± 0      | 0 ± 0      | 0 ± 0      | 0 ± 0      | 0 ± 0       | %of all microorganisms              | 0.0%    |
|                                   | P | 1      | 0 ± 0      | 0 ± 0      | 0 ± 0      | 0 ± 1       | 0 ± 0       | 0 ± 0      | 0 ± 0      | 0 ± 0      | 0 ± 0      | 0 ± 0      | 0 ± 0       | %of phage proteins for this family  | 0.0%    |
|                                   | C | 0      | 0 ± 0      | 0 ± 0      | 0 ± 0      | 0 ± 0       | 0 ± 0       | 0 ± 0      | 0 ± 0      | 0 ± 0      | 0 ± 0      | 0 ± 0      | 0 ± 0       | %of CRISPR proteins for this family | 0.0%    |
| <b>Sum of considered bacteria</b> | F | 126934 | 1879 ± 895 | 3206 ± 692 | 3272 ± 548 | 5106 ± 1150 | 4094 ± 1206 | 3067 ± 569 | 2033 ± 414 | 3265 ± 968 | 1905 ± 558 | 2485 ± 582 | 1422 ± 1408 | %of all microorganisms              | 22.6%   |
|                                   | P | 1570   | 11 ± 10    | 10 ± 6     | 9 ± 6      | 124 ± 62    | 80 ± 48     | 20 ± 12    | 79 ± 23    | 15 ± 8     | 28 ± 9     | 9 ± 10     | 9 ± 9       | %of phage proteins for this family  | 1.2%    |
|                                   | C | 184    | 1 ± 1      | 14 ± 9     | 14 ± 8     | 2 ± 3       | 0 ± 1       | 7 ± 5      | 3 ± 1      | 1 ± 2      | 1 ± 1      | 3 ± 4      | 1 ± 2       | %of CRISPR proteins for this family | 0.1%    |

| B. Archaeal families             | Total sum of spectra | Average BGP_02 | Average BGP_03 | Average BGP_04 | Average BGP_05a | Average BGP_05b | Average BGP_07 | Average BGP_09 | Average BGP_10 | Average BGP_X1 | Average BGP_X2 | Average BGP_X3 | Total amount of |                                     |      |
|----------------------------------|----------------------|----------------|----------------|----------------|-----------------|-----------------|----------------|----------------|----------------|----------------|----------------|----------------|-----------------|-------------------------------------|------|
| Methanosarcinaceae               | F                    | 22754          | 359 ± 95       | 1722 ± 395     | 1030 ± 438      | 227 ± 25        | 218 ± 36       | 366 ± 26       | 411 ± 53       | 379 ± 114      | 398 ± 81       | 498 ± 217      | 81 ± 82         | %of all microorganisms              | 4.0% |
|                                  | P                    | 0              | 0 ± 0          | 0 ± 0          | 0 ± 0           | 0 ± 0           | 0 ± 0          | 0 ± 0          | 0 ± 0          | 0 ± 0          | 0 ± 0          | 0 ± 0          | 0 ± 0           | %of phage proteins for this family  | 0.0% |
|                                  | C                    | 0              | 0 ± 0          | 0 ± 0          | 0 ± 0           | 0 ± 0           | 0 ± 0          | 0 ± 0          | 0 ± 0          | 0 ± 0          | 0 ± 0          | 0 ± 0          | 0 ± 0           | %of CRISPR proteins for this family | 0.0% |
| Methanocaldococcaceae            | F                    | 14127          | 236 ± 194      | 673 ± 28       | 475 ± 94        | 367 ± 82        | 284 ± 96       | 270 ± 48       | 217 ± 32       | 322 ± 49       | 183 ± 71       | 374 ± 213      | 132 ± 105       | %of all microorganisms              | 2.5% |
|                                  | P                    | 0              | 0 ± 0          | 0 ± 0          | 0 ± 0           | 0 ± 0           | 0 ± 0          | 0 ± 0          | 0 ± 0          | 0 ± 0          | 0 ± 0          | 0 ± 0          | 0 ± 0           | %of phage proteins for this family  | 0.0% |
|                                  | C                    | 263            | 1 ± 1          | 1 ± 1          | 1 ± 1           | 35 ± 13         | 15 ± 6         | 0 ± 1          | 0 ± 0          | 13 ± 4         | 0 ± 0          | 1 ± 1          | 0 ± 1           | %of CRISPR proteins for this family | 1.9% |
| Archaeoglobaceae                 | F                    | 5601           | 141 ± 99       | 195 ± 56       | 147 ± 35        | 171 ± 20        | 193 ± 10       | 64 ± 28        | 143 ± 31       | 96 ± 22        | 62 ± 21        | 116 ± 54       | 72 ± 85         | %of all microorganisms              | 1.0% |
|                                  | P                    | 0              | 0 ± 0          | 0 ± 0          | 0 ± 0           | 0 ± 0           | 0 ± 0          | 0 ± 0          | 0 ± 0          | 0 ± 0          | 0 ± 0          | 0 ± 0          | 0 ± 0           | %of phage proteins for this family  | 0.0% |
|                                  | C                    | 18             | 0 ± 0          | 0 ± 0          | 5 ± 2           | 0 ± 0           | 0 ± 0          | 0 ± 0          | 0 ± 0          | 0 ± 0          | 0 ± 0          | 0 ± 0          | 0 ± 0           | %of CRISPR proteins for this family | 0.3% |
| Methanomicrobiaceae              | F                    | 4637           | 22 ± 12        | 98 ± 20        | 84 ± 17         | 182 ± 27        | 131 ± 58       | 26 ± 5         | 203 ± 51       | 79 ± 8         | 112 ± 21       | 223 ± 105      | 1 ± 1           | %of all microorganisms              | 0.8% |
|                                  | P                    | 0              | 0 ± 0          | 0 ± 0          | 0 ± 0           | 0 ± 0           | 0 ± 0          | 0 ± 0          | 0 ± 0          | 0 ± 0          | 0 ± 0          | 0 ± 0          | 0 ± 0           | %of phage proteins for this family  | 0.0% |
|                                  | C                    | 0              | 0 ± 0          | 0 ± 0          | 0 ± 0           | 0 ± 0           | 0 ± 0          | 0 ± 0          | 0 ± 0          | 0 ± 0          | 0 ± 0          | 0 ± 0          | 0 ± 0           | %of CRISPR proteins for this family | 0.0% |
| Methanobacteriaceae              | F                    | 2891           | 88 ± 86        | 119 ± 38       | 42 ± 12         | 64 ± 21         | 51 ± 28        | 39 ± 7         | 57 ± 32        | 62 ± 22        | 23 ± 1         | 63 ± 48        | 117 ± 116       | %of all microorganisms              | 0.5% |
|                                  | P                    | 0              | 0 ± 0          | 0 ± 0          | 0 ± 0           | 0 ± 0           | 0 ± 0          | 0 ± 0          | 0 ± 0          | 0 ± 0          | 0 ± 0          | 0 ± 0          | 0 ± 0           | %of phage proteins for this family  | 0.0% |
|                                  | C                    | 0              | 0 ± 0          | 0 ± 0          | 0 ± 0           | 0 ± 0           | 0 ± 0          | 0 ± 0          | 0 ± 0          | 0 ± 0          | 0 ± 0          | 0 ± 0          | 0 ± 0           | %of CRISPR proteins for this family | 0.0% |
| Methanococcaceae                 | F                    | 2162           | 44 ± 34        | 103 ± 23       | 40 ± 12         | 74 ± 23         | 67 ± 15        | 10 ± 2         | 66 ± 19        | 31 ± 9         | 20 ± 3         | 84 ± 87        | 2 ± 2           | %of all microorganisms              | 0.4% |
|                                  | P                    | 0              | 0 ± 0          | 0 ± 0          | 0 ± 0           | 0 ± 0           | 0 ± 0          | 0 ± 0          | 0 ± 0          | 0 ± 0          | 0 ± 0          | 0 ± 0          | 0 ± 0           | %of phage proteins for this family  | 0.0% |
|                                  | C                    | 0              | 0 ± 0          | 0 ± 0          | 0 ± 0           | 0 ± 0           | 0 ± 0          | 0 ± 0          | 0 ± 0          | 0 ± 0          | 0 ± 0          | 0 ± 0          | 0 ± 0           | %of CRISPR proteins for this family | 0.0% |
| Thermococcaceae                  | F                    | 1945           | 12 ± 8         | 37 ± 9         | 35 ± 14         | 127 ± 17        | 112 ± 39       | 10 ± 5         | 46 ± 3         | 13 ± 4         | 59 ± 6         | 22 ± 13        | 16 ± 17         | %of all microorganisms              | 0.3% |
|                                  | P                    | 0              | 0 ± 0          | 0 ± 0          | 0 ± 0           | 0 ± 0           | 0 ± 0          | 0 ± 0          | 0 ± 0          | 0 ± 0          | 0 ± 0          | 0 ± 0          | 0 ± 0           | %of phage proteins for this family  | 0.0% |
|                                  | C                    | 132            | 0 ± 0          | 1 ± 1          | 9 ± 7           | 13 ± 7          | 8 ± 5          | 0 ± 0          | 2 ± 1          | 0 ± 0          | 1 ± 1          | 0 ± 1          | 0 ± 0           | %of CRISPR proteins for this family | 6.8% |
| Halobacteriaceae                 | F                    | 588            | 5 ± 3          | 20 ± 9         | 11 ± 7          | 25 ± 19         | 23 ± 13        | 2 ± 3          | 21 ± 15        | 3 ± 2          | 3 ± 1          | 32 ± 33        | 2 ± 3           | %of all microorganisms              | 0.1% |
|                                  | P                    | 2              | 0 ± 0          | 0 ± 0          | 0 ± 0           | 0 ± 1           | 0 ± 0          | 0 ± 0          | 0 ± 0          | 0 ± 0          | 0 ± 0          | 0 ± 0          | 0 ± 1           | %of phage proteins for this family  | 0.3% |
|                                  | C                    | 43             | 0 ± 1          | 0 ± 0          | 0 ± 0           | 4 ± 2           | 5 ± 1          | 0 ± 0          | 0 ± 0          | 2 ± 2          | 0 ± 0          | 1 ± 1          | 0 ± 0           | %of CRISPR proteins for this family | 7.3% |
| Sulfolobaceae                    | F                    | 339            | 8 ± 3          | 9 ± 2          | 12 ± 3          | 11 ± 2          | 11 ± 7         | 6 ± 3          | 4 ± 1          | 6 ± 4          | 10 ± 2         | 7 ± 1          | 2 ± 1           | %of all microorganisms              | 0.1% |
|                                  | P                    | 2              | 0 ± 0          | 0 ± 0          | 0 ± 1           | 0 ± 0           | 0 ± 0          | 0 ± 0          | 0 ± 0          | 0 ± 0          | 0 ± 0          | 0 ± 0          | 0 ± 0           | %of phage proteins for this family  | 0.6% |
|                                  | C                    | 1              | 0 ± 0          | 0 ± 0          | 0 ± 1           | 0 ± 0           | 0 ± 0          | 0 ± 0          | 0 ± 0          | 0 ± 0          | 0 ± 0          | 0 ± 0          | 0 ± 0           | %of CRISPR proteins for this family | 0.3% |
| Thermoproteaceae                 | F                    | 80             | 0 ± 1          | 2 ± 1          | 2 ± 1           | 5 ± 1           | 3 ± 2          | 3 ± 2          | 1 ± 1          | 0 ± 0          | 1 ± 1          | 2 ± 2          | 3 ± 2           | %of all microorganisms              | 0.0% |
|                                  | P                    | 0              | 0 ± 0          | 0 ± 0          | 0 ± 0           | 0 ± 0           | 0 ± 0          | 0 ± 0          | 0 ± 0          | 0 ± 0          | 0 ± 0          | 0 ± 0          | 0 ± 0           | %of phage proteins for this family  | 0.0% |
|                                  | C                    | 1              | 0 ± 0          | 0 ± 0          | 0 ± 0           | 0 ± 0           | 0 ± 0          | 0 ± 0          | 0 ± 0          | 0 ± 0          | 0 ± 1          | 0 ± 0          | 0 ± 0           | %of CRISPR proteins for this family | 1.3% |
| Haloarculaceae                   | F                    | 0              | 0 ± 0          | 0 ± 0          | 0 ± 0           | 0 ± 0           | 0 ± 0          | 0 ± 0          | 0 ± 0          | 0 ± 0          | 0 ± 0          | 0 ± 0          | 0 ± 0           | %of all microorganisms              | 0.0% |
|                                  | P                    | 63             | 0 ± 0          | 0 ± 0          | 1 ± 1           | 0 ± 0           | 0 ± 0          | 0 ± 0          | 2 ± 1          | 1 ± 1          | 10 ± 8         | 1 ± 1          | 2 ± 3           | %of phage proteins for this family  | 0.0% |
|                                  | C                    | 0              | 0 ± 0          | 0 ± 0          | 0 ± 0           | 0 ± 0           | 0 ± 0          | 0 ± 0          | 0 ± 0          | 0 ± 0          | 0 ± 0          | 0 ± 0          | 0 ± 0           | %of CRISPR proteins for this family | 0.0% |
| <b>Sum of considered archaea</b> | F                    | 55124          | 915 ± 536      | 2977 ± 580     | 1876.3 ± 633    | 1251.3 ± 237    | 1091.8 ± 305   | 794.5 ± 129    | 1168.3 ± 238   | 990.75 ± 234   | 870.25 ± 207   | 1420 ± 773     | 426 ± 414       | %of all microorganisms              | 9.8% |
|                                  | P                    | 67             | 0 ± 0          | 0 ± 0          | 1.25 ± 1.3      | 0.25 ± 0.5      | 0 ± 0          | 0 ± 0          | 1.75 ± 0.5     | 0.75 ± 1       | 9.75 ± 8.1     | 1 ± 0.8        | 2 ± 4           | %of phage proteins for this family  | 0.1% |
|                                  | C                    | 458            | 1 ± 1.5        | 1.75 ± 1.8     | 14.25 ± 9.4     | 51.25 ± 22      | 27.5 ± 12      | 0.25 ± 0.5     | 1.5 ± 1        | 14.5 ± 6.3     | 0.75 ± 1.1     | 1.5 ± 2        | 0.25 ± 0.5      | %of CRISPR proteins for this family | 0.8% |

| C. Others |        | Total sum of spectra | Average BGP_02 | Average BGP_03 | Average BGP_04 | Average BGP_05a | Average BGP_05b | Average BGP_07 | Average BGP_09 | Average BGP_10 | Average BGP_X1 | Average BGP_X2 | Average BGP_X3 | Total amount of                          |
|-----------|--------|----------------------|----------------|----------------|----------------|-----------------|-----------------|----------------|----------------|----------------|----------------|----------------|----------------|------------------------------------------|
| F         | 348885 | 6845 ± 1273          | 11948 ± 1753   | 8775 ± 1383    | 13245 ± 2432   | 10335 ± 2670    | 7455 ± 366      | 5947 ± 400     | 5942 ± 1002    | 5816 ± 1395    | 7253 ± 1418    | 3662           | 2406           | %of all microorganisms 62.0%             |
| P         | 7703   | 48 ± 20              | 115 ± 12       | 156 ± 74       | 627 ± 178      | 470 ± 187       | 110 ± 7         | 76 ± 18        | 49 ± 8         | 190 ± 149      | 70 ± 18        | 15             | 10             | %of phage proteins for this family 2.2%  |
| C         | 2611   | 14 ± 7               | 151 ± 55       | 71 ± 50        | 205 ± 22       | 173 ± 44        | 4 ± 2           | 3 ± 2          | 15 ± 9         | 2 ± 2          | 12 ± 15        | 3              | 5              | %of CRISPR proteins for this family 0.7% |
| F         | 31447  | 477 ± 148            | 1139 ± 336     | 731 ± 73       | 1062 ± 225     | 798 ± 253       | 836 ± 37        | 591 ± 75       | 501 ± 31       | 546 ± 44       | 762 ± 171      | 420            | 252            | %of all microorganisms 5.6%              |
| P         | 0      | 0 ± 0                | 0 ± 0          | 0 ± 0          | 0 ± 0          | 0 ± 0           | 0 ± 0           | 0 ± 0          | 0 ± 0          | 0 ± 0          | 0 ± 0          | 0              | 0              | %of phage proteins for this family 0.0%  |
| C         | 0      | 0 ± 0                | 0 ± 0          | 0 ± 0          | 0 ± 0          | 0 ± 0           | 0 ± 0           | 0 ± 0          | 0 ± 0          | 0 ± 0          | 0 ± 0          | 0              | 0              | %of CRISPR proteins for this family 0.0% |

| D. Overall |        | Total sum of spectra | Average BGP_02 | Average BGP_03 | Average BGP_04 | Average BGP_05a | Average BGP_05b | Average BGP_07 | Average BGP_09 | Average BGP_10 | Average BGP_X1 | Average BGP_X2 | Average BGP_X3 | Total amount of                          |
|------------|--------|----------------------|----------------|----------------|----------------|-----------------|-----------------|----------------|----------------|----------------|----------------|----------------|----------------|------------------------------------------|
| F          | 562390 | 10116 ± 2228         | 19270 ± 3006   | 14655 ± 2402   | 20664 ± 3631   | 16319 ± 4223    | 12151 ± 609     | 9739 ± 617     | 10698 ± 1986   | 9137 ± 2078    | 11920 ± 2436   | 5930 ± 3638    |                | %of all microorganisms 100.0%            |
| P          | 9340   | 59 ± 25              | 125 ± 11       | 166 ± 70       | 751 ± 200      | 550 ± 191       | 130 ± 7         | 157 ± 10       | 65 ± 12        | 228 ± 149      | 80 ± 20        | 26 ± 15        |                | %of phage proteins for this family 1.7%  |
| C          | 3253   | 16 ± 9               | 166 ± 63       | 100 ± 64       | 258 ± 22       | 201 ± 48        | 11 ± 4          | 8 ± 3          | 30 ± 10        | 4 ± 3          | 17 ± 17        | 4 ± 6          |                | %of CRISPR proteins for this family 0.6% |
